# Supplementary material for: Ankylosing spondylitis diagnosis in US patients with back pain: identifying providers involved and factors associated with rheumatology referral delay
Source: Springer Nature journal article supplement (doi:10.1007/s10067-016-3231-z), 2016-03-18
Supplement: MOESM1 [file 8718710]

SUPPLEMENTARY MATERIAL

**Table S1. ICD-9 diagnoses codes associated with non-inflammatory or mechanical back pain**

| ICD-9 Code | Diagnosis                                                     |
|------------|---------------------------------------------------------------|
| 307.89     | Psychogenic backache                                          |
| 719.49     | Pain in Joint                                                 |
| 721.42     | Lumbar spondylosis with myelopathy                            |
| 721.6      | Ankylosing vertebral hyperostosis                             |
| 721.7      | Traumatic spondylopathy                                       |
| 721.8      | Other allied disorders of spine                               |
| 721.9      | Spondylosis of unspecified site without myelopathy            |
| 721.91     | Spondylosis of unspecified site with myelopathy               |
| 722.1      | Displacement of lumbar disc without myelopathy                |
| 722.2      | Displacement of unspecified disc without myelopathy           |
| 722.32     | Intervertebral disc disorders (lumbar region)                 |
| 722.52     | Degeneration of lumbar or lumbosacral Intervertebral disc     |
| 722.6      | Degeneration of intervertebral disc, site unspecified         |
| 722.73     | Intervertebral disc disorders with myelopathy (lumbar region) |
| 722.83     | Postlaminectomy syndrome (lumbar region)                      |

722.9 Other and unspecified disc disorder, unspecified region

722.93 Other and unspecified disc disorder, lumbar region

724 Spinal stenosis other than cervical, unspecified region

724.02 Spinal stenosis other than cervical, lumbar region

724.09 Spinal stenosis other than cervical, other

724.2 Lumbago (nonspecific backache)

724.3 Sciatica

724.4 Thoracic or lumbosacral neuritis or radiculitis, unspecified

724.5 Backache, unspecified

724.6 Disorder of sacrum

724.8 Other symptoms referable to back

724.9 Other unspecified back disorders

737.2 Lordosis

738.4 Acquired spondylolisthesis

739.3 Nonallopathic lesions, not elsewhere classified, lumbar region

739.4 Nonallopathic lesions, not elsewhere classified, sacral region

756.1 Anomaly of spine, unspecified

756.12 Spondylolisthesis

805.4 Lumbar fracture

805.6 Sacrum and coccyx fracture

805.8 Vertebral fracture of unspecified site

846.x Sprains and strains of sacroiliac region

Mechanical complication of internal orthopedic device, implant and

996.4 graft

---
